# Supplementary material
Source: publisher figshare collection journal article supplement (https://sage.figshare.com/ndownloader/files/14878067)
Supplement: Supplementary file 1 [file 14878067]

**Supplementary Table 1. Comparisons of demographic data, clinical manifestations, and mortality of lupus nephritis patients**

|                                     | Death (n=5) |          | Alive (n=70) |         | Total (n=75) |         | <i>p</i> value     |
|-------------------------------------|-------------|----------|--------------|---------|--------------|---------|--------------------|
| Age                                 | 37.8        | ±12.9    | 30.0         | ±11.5   | 30.5         | ±11.6   | 0.181              |
| Sex (Female)                        | 5           | (100.0%) | 64           | (91.4%) | 69           | (92.0%) | 1.000 <sup>f</sup> |
| Comorbidity                         |             |          |              |         |              |         |                    |
| Hypertension                        | 4           | (80.0%)  | 38           | (54.3%) | 42           | (56.0%) | 0.377 <sup>f</sup> |
| DM                                  | 0           | (0.0%)   | 1            | (1.4%)  | 1            | (1.3%)  | 1.000 <sup>f</sup> |
| Lab data                            |             |          |              |         |              |         |                    |
| DUP (gm/day)                        | 2.8         | ±1.6     | 3.4          | ±2.6    | 3.3          | ±2.5    | 0.848              |
| Creatinine (mg/dl)                  | 1.6         | ±0.8     | 1.3          | ±1.1    | 1.3          | ±1.0    | 0.194              |
| eGFR (mL/min)                       | 48.1        | ±22.8    | 80.5         | ±54.8   | 78.3         | ±53.8   | 0.106              |
| Anti-dsDNA (WHO units/mL)           | 115.9       | ±110.9   | 555.1        | ±393.4  | 525.8        | ±396.4  | 0.006**            |
| C3 (mg/dl)                          | 61.6        | ±12.5    | 61.4         | ±25.3   | 61.4         | ±24.6   | 0.890              |
| C4 (mg/dl)                          | 16.8        | ±11.5    | 13.0         | ±8.5    | 13.3         | ±8.7    | 0.457              |
| SLEDAI                              | 10.2        | ±2.5     | 13.5         | ±4.3    | 13.3         | ±4.2    | 0.080              |
| Activity index                      | 4.6         | ±2.6     | 5.8          | ±4.4    | 5.7          | ±4.3    | 0.599              |
| cellular crescent                   | 2           | (40.0%)  | 19           | (28.4%) | 21           | (29.2%) | 0.625 <sup>f</sup> |
| necrotizing lesion                  | 1           | (20.0%)  | 37           | (55.2%) | 38           | (52.8%) | 0.182 <sup>f</sup> |
| endocapillary proliferation         | 4           | (80.0%)  | 53           | (79.1%) | 57           | (79.2%) | 1.000 <sup>f</sup> |
| wire loop                           | 2           | (40.0%)  | 33           | (49.3%) | 35           | (48.6%) | 1.000 <sup>f</sup> |
| neutrophils, infiltration           | 1           | (20.0%)  | 23           | (34.3%) | 24           | (33.3%) | 0.659 <sup>f</sup> |
| interstitial inflammation           | 3           | (60.0%)  | 39           | (58.2%) | 42           | (58.3%) | 1.000 <sup>f</sup> |
| Chronicity index                    | 1.6         | ±1.1     | 2.1          | ±2.8    | 2.1          | ±2.7    | 0.875              |
| glomerular sclerosis                | 3           | (60.0%)  | 38           | (56.7%) | 41           | (56.9%) | 1.000 <sup>f</sup> |
| tubular, atrophy                    | 2           | (40.0%)  | 27           | (40.3%) | 29           | (40.3%) | 1.000 <sup>f</sup> |
| interstitial fibrosis               | 2           | (40.0%)  | 28           | (41.8%) | 30           | (41.7%) | 1.000 <sup>f</sup> |
| fibrous crescent                    | 1           | (20.0%)  | 4            | (6.0%)  | 5            | (6.9%)  | 0.310 <sup>f</sup> |
| Induction therapy                   |             |          |              |         |              |         | 0.658              |
| MPA                                 | 1           | (20.0%)  | 29           | (41.4%) | 30           | (40.0%) |                    |
| MPA combination                     | 1           | (20.0%)  | 14           | (20.0%) | 15           | (20.0%) |                    |
| Cyclophosphamide                    | 2           | (40.0%)  | 13           | (18.6%) | 15           | (20.0%) |                    |
| Azathioprine                        | 1           | (20.0%)  | 14           | (20.0%) | 15           | (20.0%) |                    |
| Intravenous steroid pulse           | 1           | (20.0%)  | 3            | (4.3%)  | 4            | (5.3%)  | 0.246 <sup>f</sup> |
| Oral steroid starting dose (mg/day) | 27.5        | ±15.1    | 24.9         | ±10.9   | 25.0         | ±11.1   | 0.966              |

Chi-Square test. <sup>f</sup>Fisher's Exact test. Mann-Whitney U test. \**p*<0.05, \*\**p*<0.01.

DM: Diabetes mellitus; eGFR: estimated glomerular filtration rate; SLEDAI: SLE disease activity index; MPA: mycophenolic acid
